# Supplementary material
Source: publisher figshare collection journal article supplement (https://acs.figshare.com/ndownloader/files/9751420)
Supplement: Supplementary file 1 [file 9751420]

---

## SUPPORTING INFORMATION

# Temperature and composition dependent DNA condensation by thermo-sensitive block copolymer

Satyagopal Sahoo, Sharmita Bera, Saikat Maiti, and Dibakar Dhara\*

*Department of Chemistry,  
Indian Institute of Technology Kharagpur,  
West Bengal 721302, India*

\*Corresponding Author

Email: [dibakar@chem.iitkgp.ernet.in](mailto:dibakar@chem.iitkgp.ernet.in), [dibakar@live.in](mailto:dibakar@live.in)

## SUPPORTING FIGURES

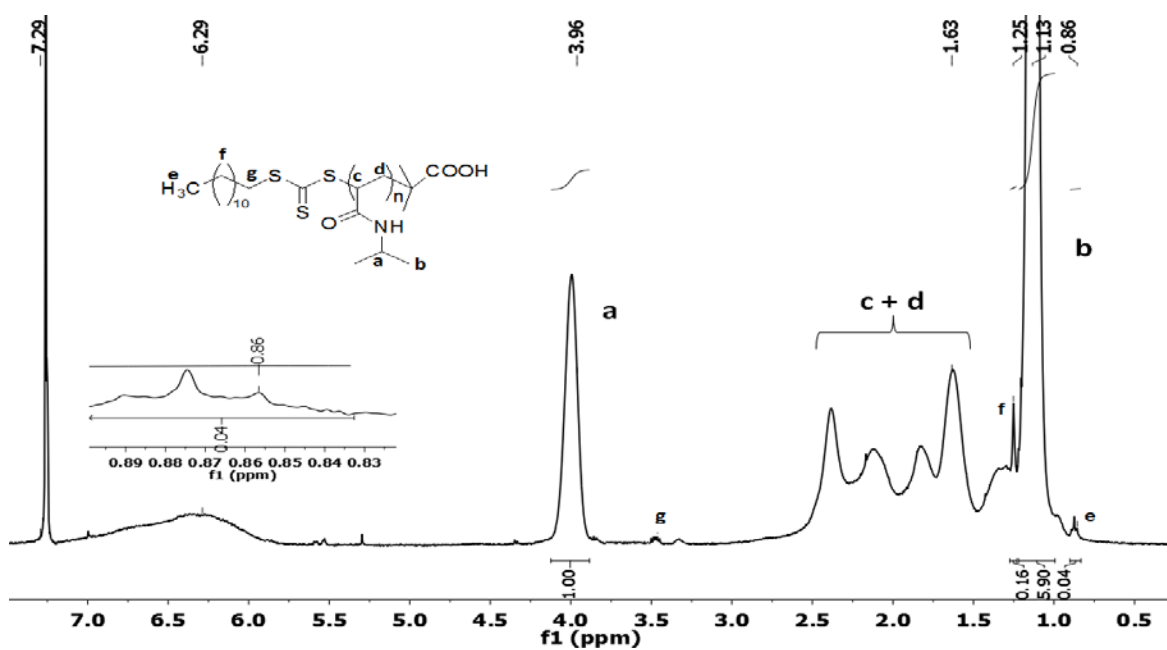

**Figure S1:**  $^1\text{H}$ NMR spectra (in  $\text{CDCl}_3$ ) of PNIPA macro-CTA in 400MHz.

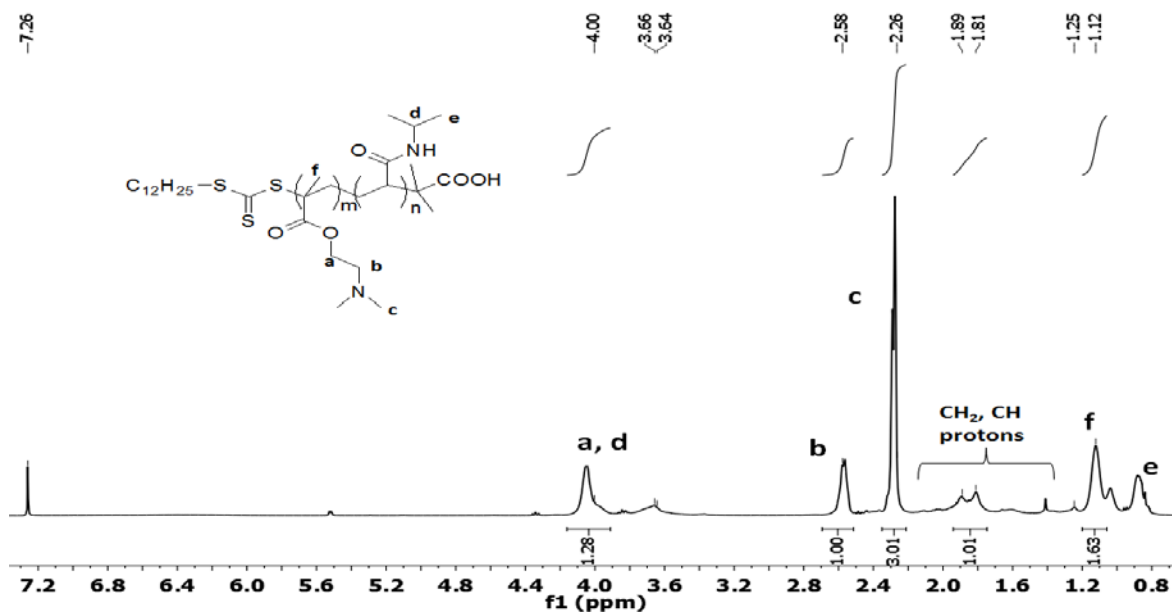

**Figure S2:**  $^1\text{H}$ NMR spectra (in  $\text{CDCl}_3$ ) of NIDM 135 in 400MHz.

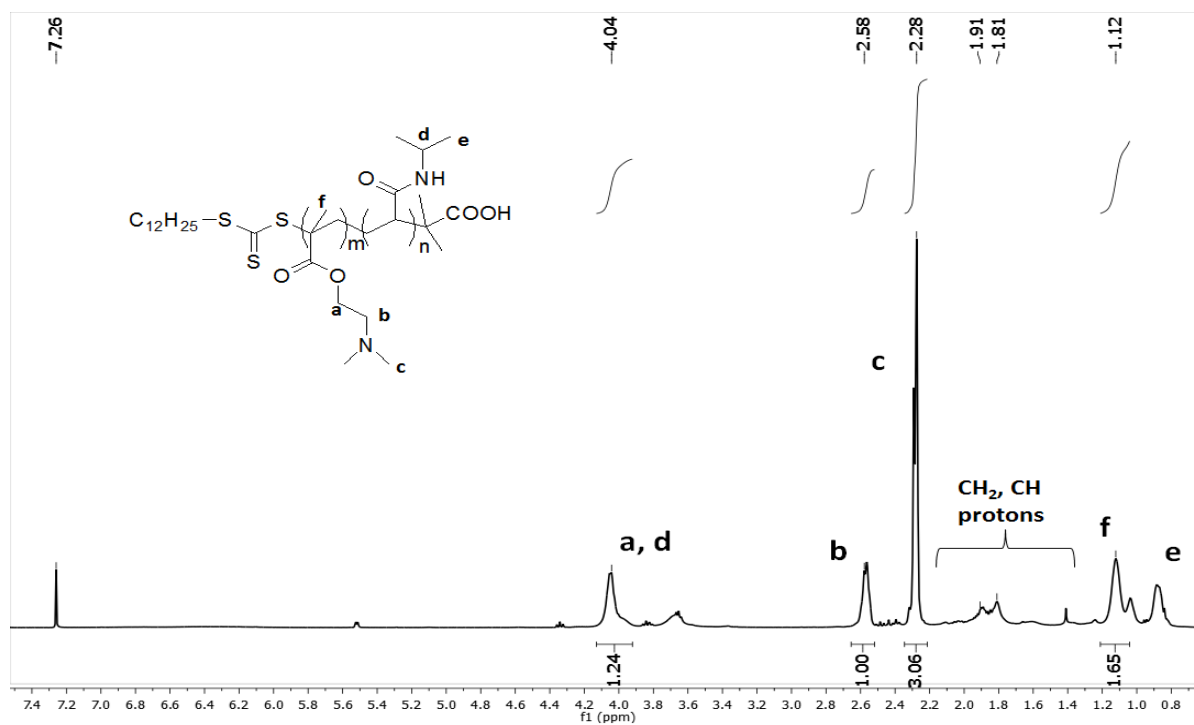

**Figure S3:**  $^1\text{H}$ NMR spectra (in  $\text{CDCl}_3$ ) of NIDM 158 in 400MHz.

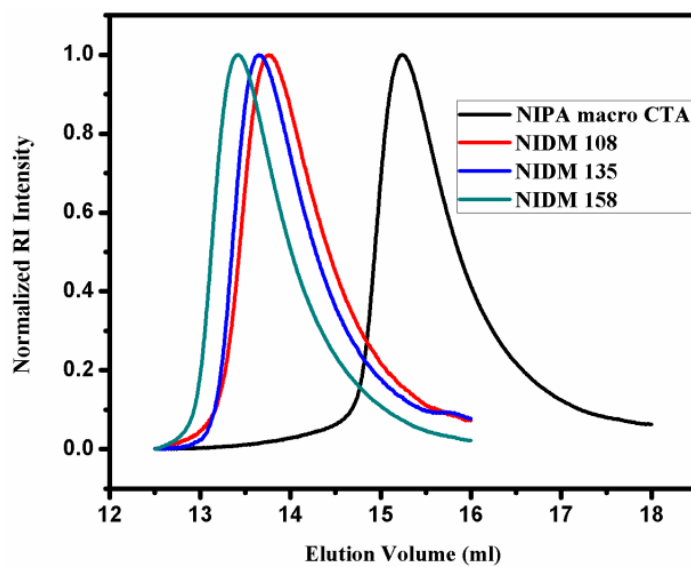

**Figure S4:** GPC traces of three copolymers.

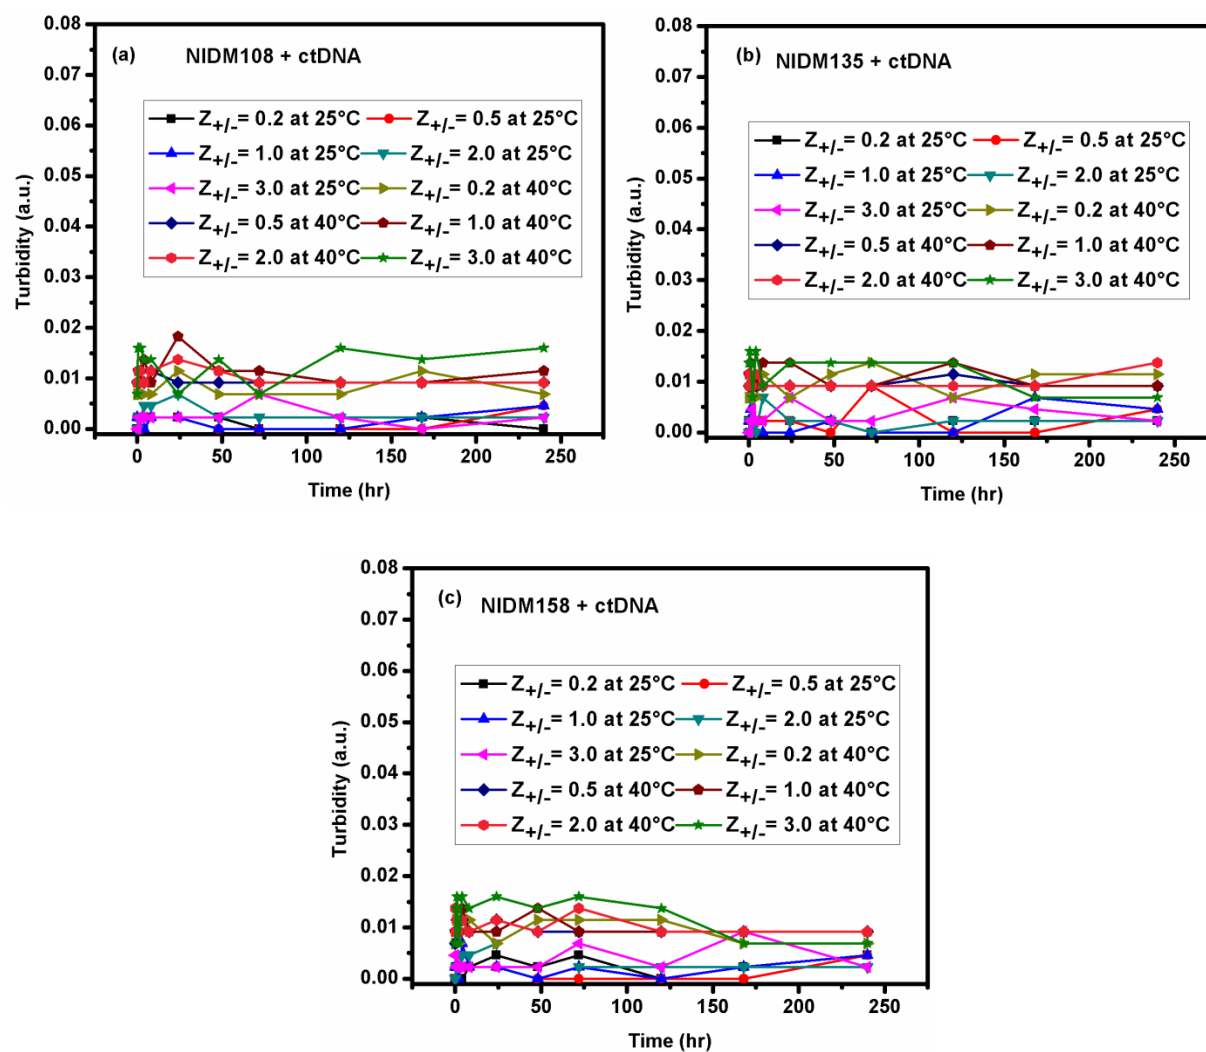

**Figure S5:** Turbidity measurements of polyplexes NIDM108/ctDNA (a), NIDM135/ctDNA (b) and NIDM158/ctDNA (c) at 25 °C and 40 °C.

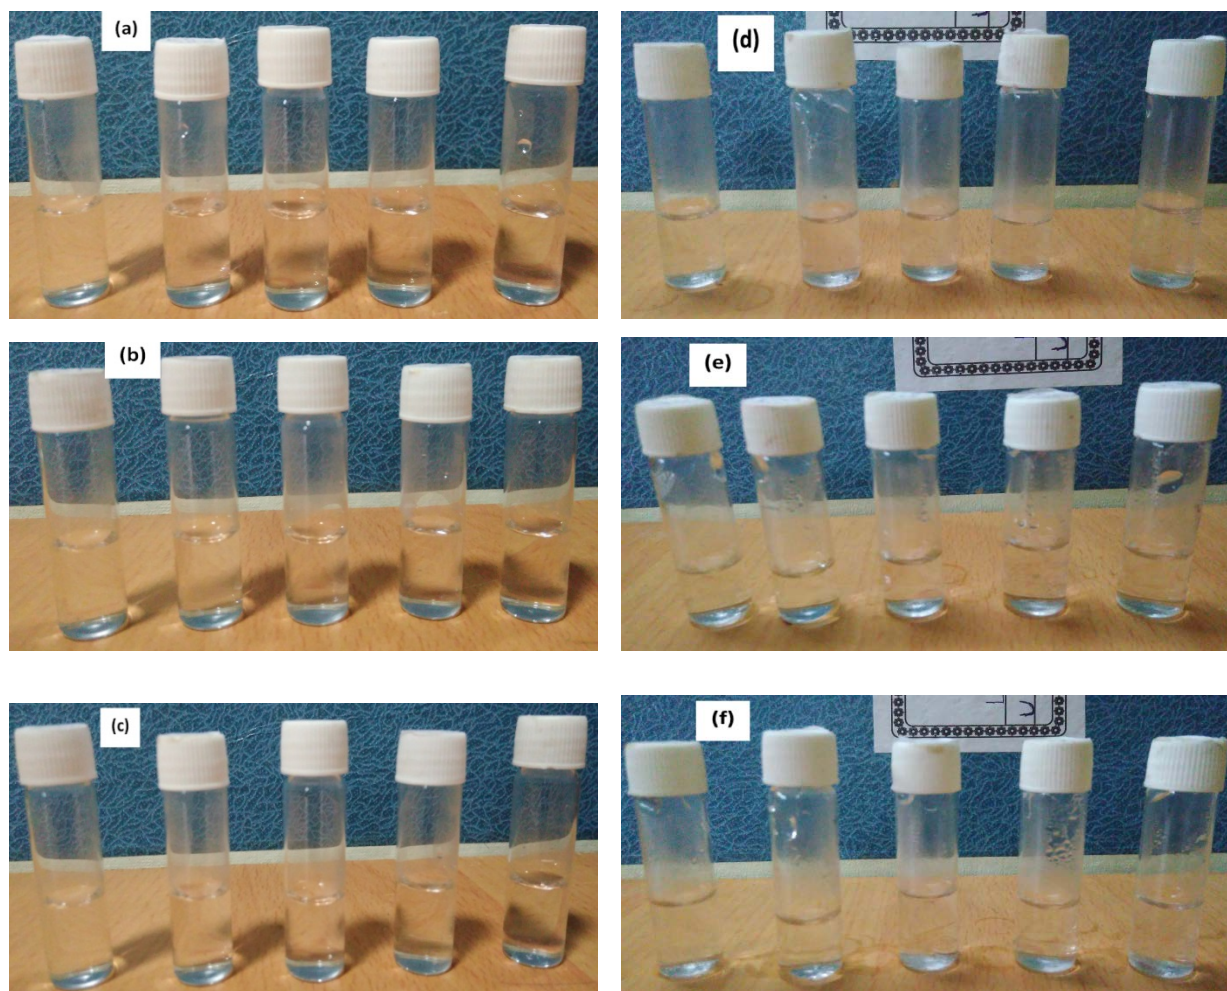

**Figure S6:** Images of polyplex solutions kept in vials of (a, d) NIDM108/DNA, (b, e) NIDM135/DNA and (c, f) NIDM158/DNA polyplexes. Left side and right side represent images taken at 25 °C and 40 °C, respectively. Vials from left to right - 1<sup>st</sup>:  $Z_{+/-} = 0.2$ ; 2<sup>nd</sup>:  $Z_{+/-} = 0.5$ ; 3<sup>rd</sup>:  $Z_{+/-} = 1.0$ ; 4<sup>th</sup>:  $Z_{+/-} = 2.0$ ; 5<sup>th</sup>:  $Z_{+/-} = 3.0$ .

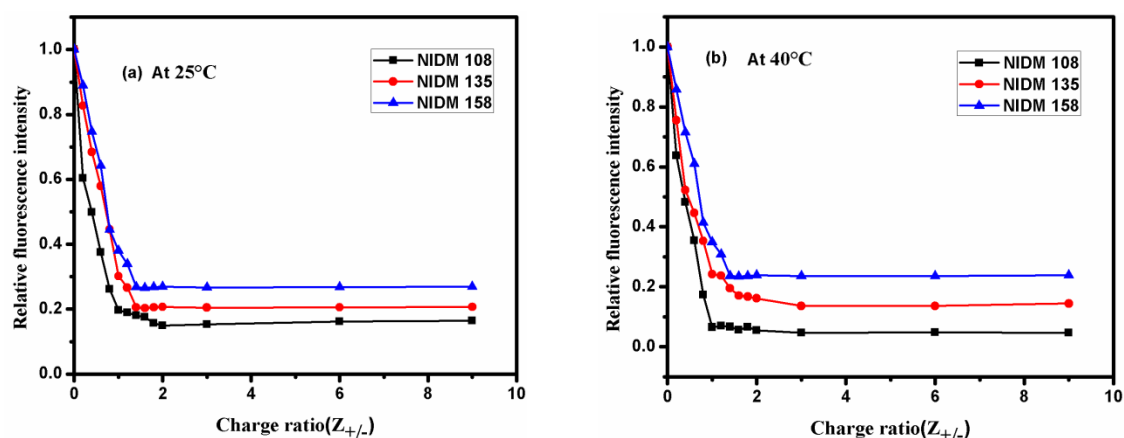

**Figure S7:** Temperature dependent relative fluorescence spectra of ethidium bromide (EB)-DNA complex in the presence of various amounts of cationic block copolymers plotted at 25 °C (a) and 40 °C (b).

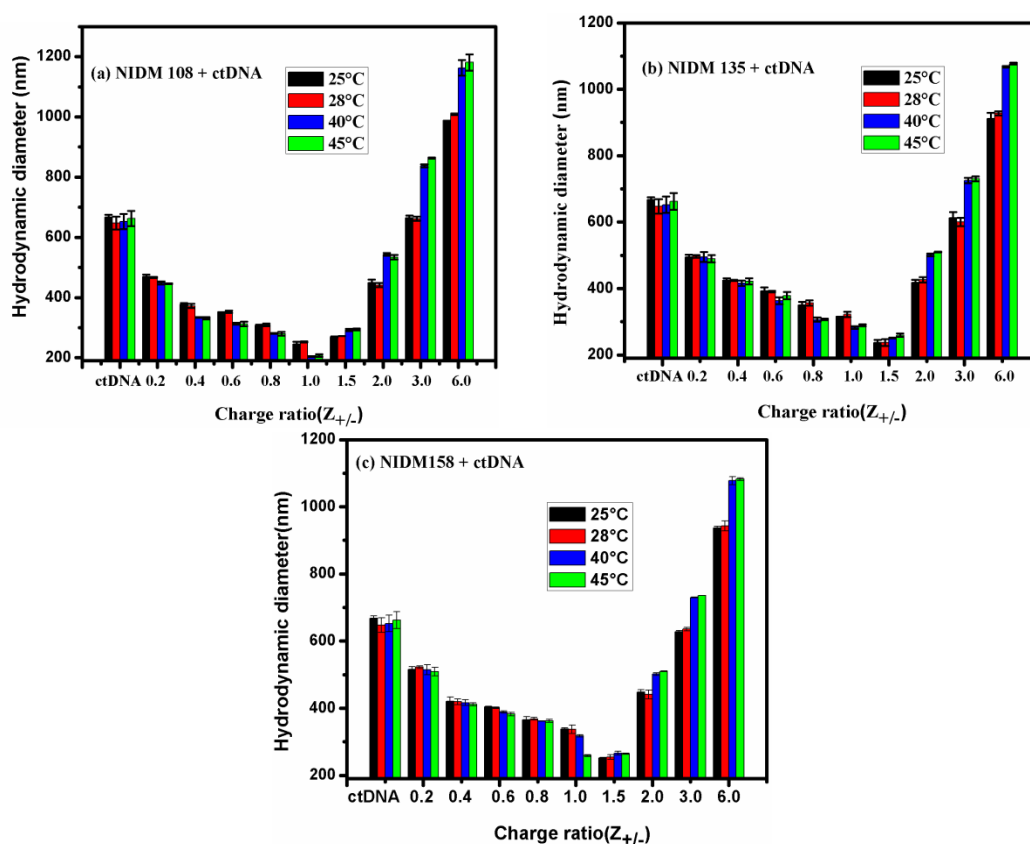

**Figure S8:** Temperature dependent relative Size of DNA-cationic block copolymer polyplexes NIDM108/ctDNA (a), NIDM135/ctDNA (b) and NIDM158/ctDNA (c). The complexes were formed at a fixed DNA concentration of 25  $\mu$ M and varying concentrations of (co)polymer. Particles sizes were determined at 25 °C, 28 °C, 40 °C and 45 °C.

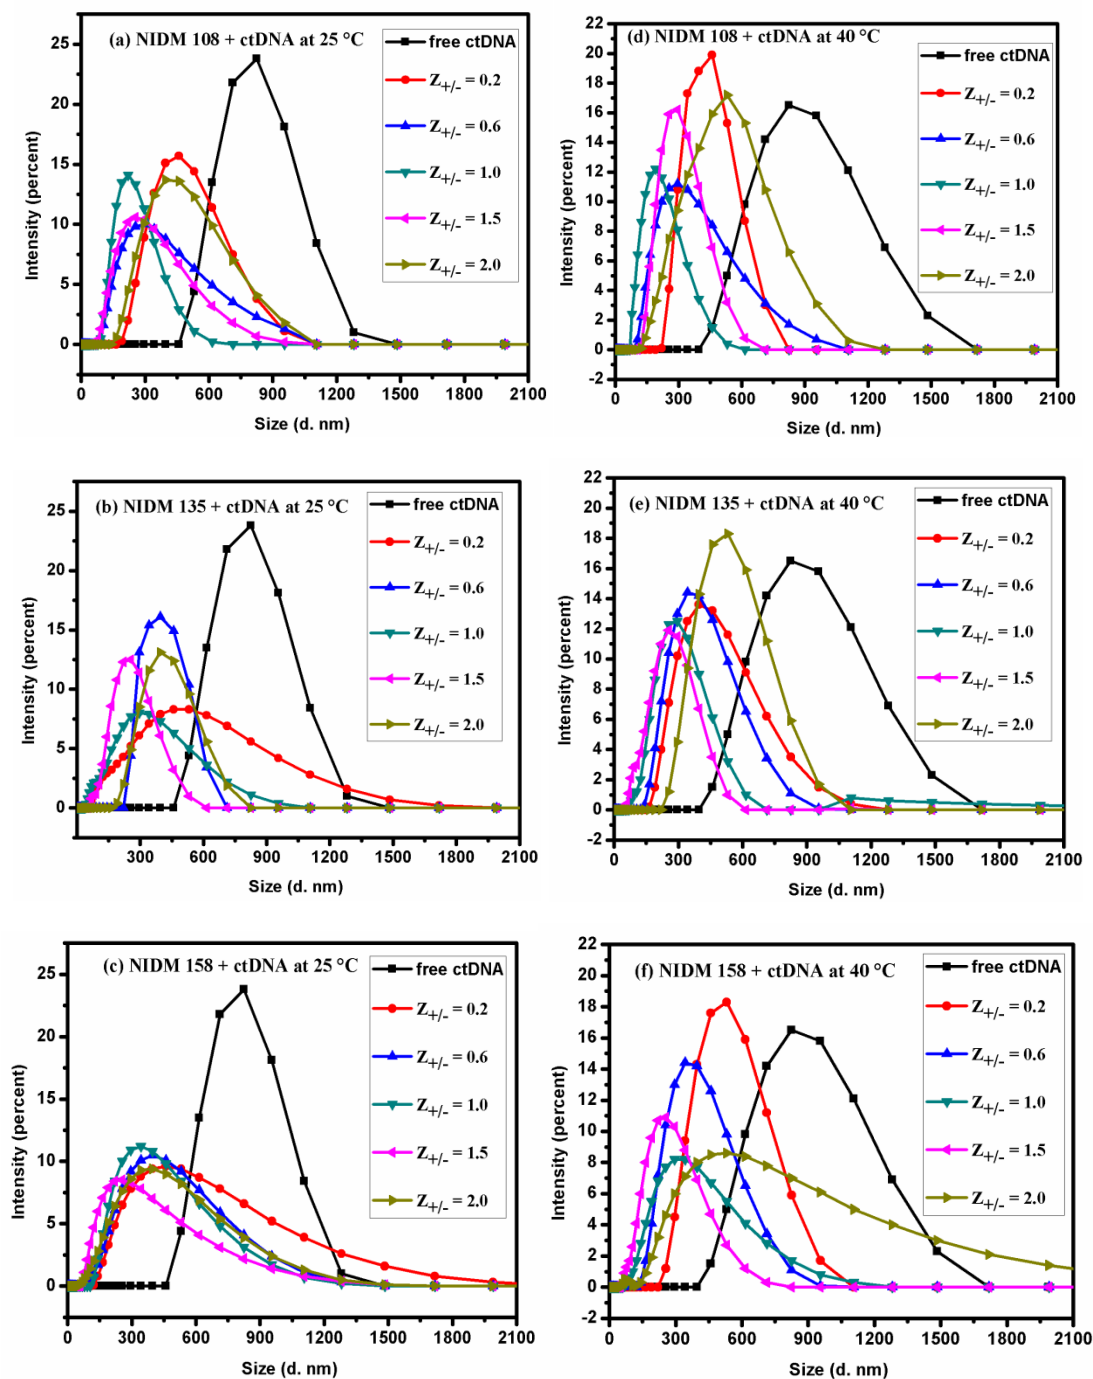

**Figure S9:** Intensity-weighted size distribution of formed polyplexes NIDM108/ctDNA (a, d), NIDM135/ctDNA (b, e) and NIDM158/ctDNA (c, f) obtained from DLS.

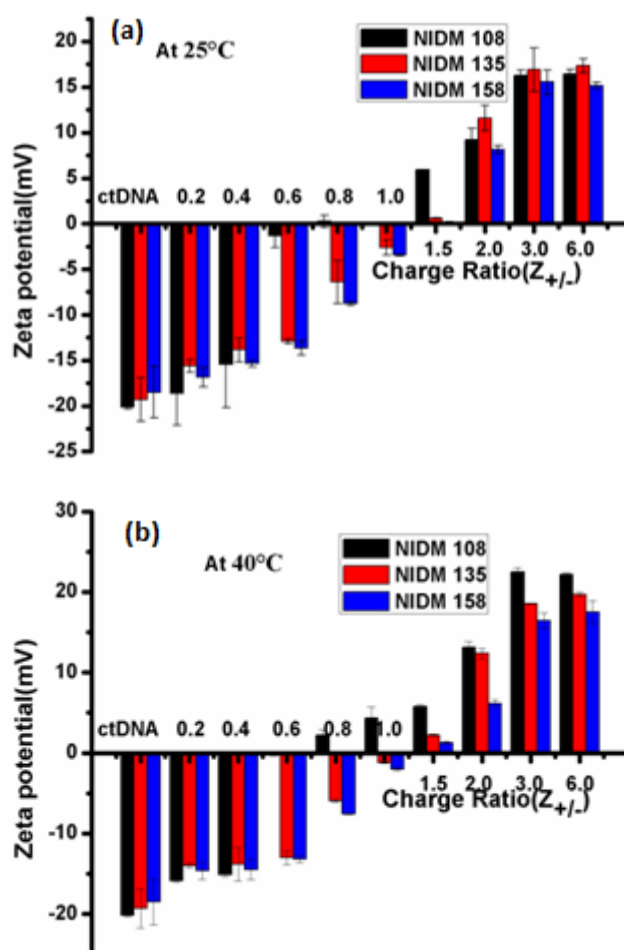

**Figure S10:** Temperature dependent zeta potential ( $\zeta$ ) of DNA–cationic block copolymer polyplexes complexes at a fixed DNA concentration of 25  $\mu$ M and varying concentrations of (co)polymer. zeta potentials were determined at 25 °C (a) and 28 °C (b).

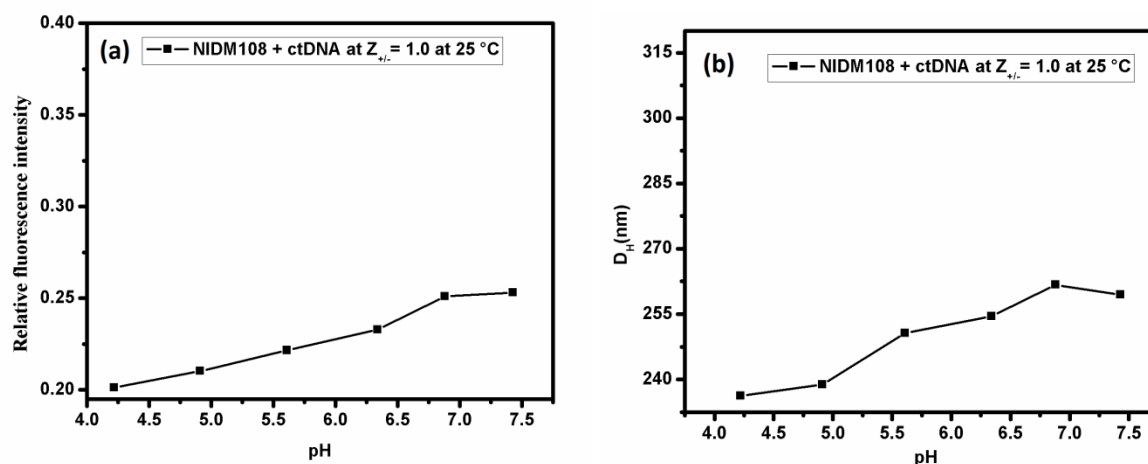

**Figure S11:** (a) Relative fluorescence intensity and (b) hydrodynamic size of the NIDM108/ctDNA polyplex at  $Z_{+/-} = 1.0$ . The polyplex was first prepared at pH = 4.2 following which the pH was increased by addition of dilute NaOH. 15 Min of equilibration time was provided at each pH before recording spectra.

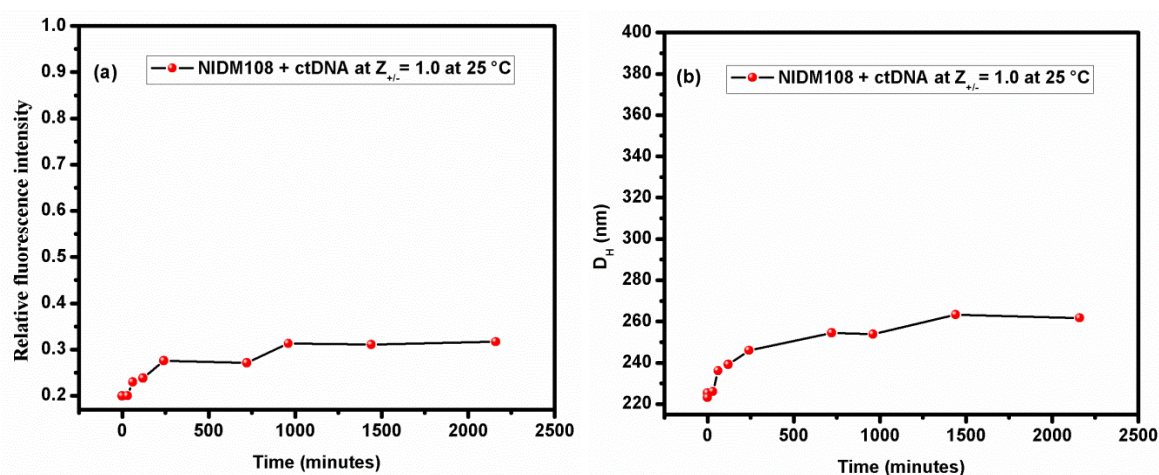

**Figure S12:** (a) Relative fluorescence intensity and (b) hydrodynamic size of the NIDM108/ctDNA polyplex at  $Z_{+/-} = 1.0$ . The polyplex was first prepared at pH = 4.2 following which the pH was increased to 7.4 at once by addition of dilute NaOH. EB exclusion and hydrodynamic size were monitored with time.
